# Supplementary material for: Kinetics and mechanism of the reactions of Pd(ii) complexes with azoles and diazines. Crystal structure of [Pd(bpma)(H2O)](ClO4)2·2H2O
Source: Royal Society of Chemistry journal article supplement (doi:10.1039/b516771j), 2006-01-01
Supplement: b516771j.pdf [file b516771j.pdf]

**Kinetic and mechanistic study of the reactions of Pd(II) complexes with azols and diazines. Crystal structure of [Pd(bpma)(H<sub>2</sub>O)](ClO<sub>4</sub>)<sub>2</sub>·2H<sub>2</sub>O**

Živadin D. Bugarčić,<sup>a,b</sup> Sharanappa T. Nandibewoor,<sup>a,c</sup> Mohamed S. M. Hamza,<sup>a,d</sup>  
Frank Heinemann<sup>a</sup> and Rudi van Eldik<sup>a,\*</sup>

Table S1. Observed pseudo-first-order rate constants as a function of nucleophile concentration for the reaction of [Pd(dien)H<sub>2</sub>O]<sup>2+</sup> with triazole and pyrazole; 0.10 M NaClO<sub>4</sub>, pH = 2.8.<sup>a</sup>

| T/°C | C <sub>triazole</sub> /M | k <sub>obsd</sub> /s <sup>-1</sup> | C <sub>pyrazole</sub> /M | k <sub>obsd</sub> /s <sup>-1</sup> |
|------|--------------------------|------------------------------------|--------------------------|------------------------------------|
| 15   | 0.0075                   | 45.4(5)                            | 0.0075                   | 27.5(5)                            |
| 15   | 0.01                     | 64.3(7)                            | 0.01                     | 41.1(7)                            |
| 15   | 0.02                     | 138(8)                             | 0.015                    | 60.2(5)                            |
| 15   | 0.03                     | 215(4)                             | 0.02                     | 87.1(6)                            |
| 15   | 0.04                     | 270(9)                             | 0.04                     | 170(4)                             |
| 15   | 0.05                     | 329(5)                             | 0.05                     | 200(8)                             |

<sup>a</sup>Number of kinetic runs in parenthesis.

Table S2. Observed pseudo-first-order rate constants as a function of nucleophile concentration for the reaction of  $[\text{Pd}(\text{dien})\text{H}_2\text{O}]^{2+}$  with pyrimidine, pyrazine and pyridazine; 0.10 M  $\text{NaClO}_4$ , pH = 2.8.<sup>a</sup>

| T/°C | C <sub>pyrimidine</sub> /M | k <sub>obsd</sub> /s <sup>-1</sup> | C <sub>pyrazine</sub> /M | k <sub>obsd</sub> /s <sup>-1</sup> | C <sub>pyridazine</sub> /M | k <sub>obsd</sub> /s <sup>-1</sup> |
|------|----------------------------|------------------------------------|--------------------------|------------------------------------|----------------------------|------------------------------------|
| 15   | 0.0075                     | 22.3(5)                            | 0.0075                   | 18.7(5)                            | 0.0075                     | 36.1(5)                            |
| 15   | 0.01                       | 28.6(7)                            | 0.01                     | 24.9(5)                            | 0.01                       | 50(4)                              |
| 15   | 0.02                       | 57.9(4)                            | 0.015                    | 54.2(5)                            | 0.02                       | 105(7)                             |
| 15   | 0.03                       | 87.4(4)                            | 0.02                     | 74.2(7)                            | 0.03                       | 170(4)                             |
| 15   | 0.04                       | 115(8)                             | 0.04                     | 100(4)                             | 0.04                       | 215(4)                             |
| 15   | 0.05                       | 140(5)                             | 0.05                     | 128(6)                             | 0.05                       | 253(8)                             |

<sup>a</sup>Number of kinetic runs in parenthesis.

Table S3. Observed pseudo-first-order rate constants as a function of nucleophile concentration for the reaction of  $[\text{Pd}(\text{bpma})\text{H}_2\text{O}]^{2+}$  with triazole and pyrazole; 0.10 M  $\text{NaClO}_4$ , pH = 2.8.<sup>a</sup>

| T/°C | C <sub>triazole</sub> /M | k <sub>obsd</sub> /s <sup>-1</sup> | C <sub>pyrazole</sub> /M | k <sub>obsd</sub> /s <sup>-1</sup> |
|------|--------------------------|------------------------------------|--------------------------|------------------------------------|
| 15   | 0.0015                   | 50.6(5)                            | 0.02                     | 256.7(5)                           |
| 15   | 0.003                    | 100.1(4)                           | 0.03                     | 323.1(5)                           |
| 15   | 0.0045                   | 142.2(7)                           | 0.04                     | 463.2(5)                           |
| 15   | 0.006                    | 179.9(4)                           | 0.05                     | 610(6)                             |
| 15   | 0.0075                   | 208.6(8)                           | 0.06                     | 700(4)                             |
| 15   | 0.01                     | 267.8(5)                           |                          |                                    |

<sup>a</sup>Number of kinetic runs in parenthesis.

Table S4. Observed pseudo-first-order rate constants as a function of nucleophile concentration for the reaction of  $[\text{Pd}(\text{bpma})\text{H}_2\text{O}]^{2+}$  with pyrimidine, pyrazine and pyridazine; 0.10 M  $\text{NaClO}_4$ , pH = 2.8.<sup>a</sup>

| T/°C | C <sub>pyrimidine</sub> /M | k <sub>obsd</sub> /s <sup>-1</sup> | C <sub>pyrazine</sub> /M | k <sub>obsd</sub> /s <sup>-1</sup> | C <sub>pyridazine</sub> /M | k <sub>obsd</sub> /s <sup>-1</sup> |
|------|----------------------------|------------------------------------|--------------------------|------------------------------------|----------------------------|------------------------------------|
| 15   | 0.00075                    | 11.3(5)                            | 0.00075                  | 13.2(5)                            |                            |                                    |
| 15   | 0.001                      | 12.7(7)                            | 0.001                    | 17.8(8)                            |                            |                                    |
| 15   | 0.0015                     | 18.1(4)                            | 0.0015                   | 22.6(5)                            | very fast                  |                                    |
| 15   | 0.00225                    | 27.5(6)                            | 0.0225                   | 35.1(7)                            |                            |                                    |
| 15   | 0.003                      | 36.4(4)                            | 0.003                    | 44.9(4)                            |                            |                                    |
| 15   | 0.00375                    | 49(5)                              |                          |                                    |                            |                                    |

<sup>a</sup> Number of kinetic runs in parenthesis.

Table S5. Observed pseudo-first-order rate constants as a function of nucleophile concentration for the reaction of  $[\text{Pd}(\text{dien})\text{Cl}]^+$  with triazole and pyrazole; 0.10 M  $\text{NaClO}_4$ , 0.010M  $\text{NaCl}$ , pH = 2.8.<sup>a</sup>

| T/°C | C <sub>triazole</sub> /M | k <sub>obsd</sub> /s <sup>-1</sup> | C <sub>pyrazole</sub> /M | k <sub>obsd</sub> /s <sup>-1</sup> |
|------|--------------------------|------------------------------------|--------------------------|------------------------------------|
| 25   | 0.006                    | 3.87(5)                            | 0.006                    | 3.63(8)                            |
| 25   | 0.0075                   | 5.26(4)                            | 0.075                    | 5.24(5)                            |
| 25   | 0.01                     | 6.90(7)                            | 0.01                     | 6.34(5)                            |
| 25   | 0.015                    | 10.9(4)                            | 0.015                    | 9.64(4)                            |
| 25   | 0.02                     | 14.6(6)                            | 0.02                     | 12.5(7)                            |
| 25   | 0.03                     | 20(5)                              | 0.03                     | 17.9(4)                            |

<sup>a</sup> Number of kinetic runs in parenthesis.

Table S6. Observed pseudo-first-order rate constants as a function of nucleophile concentration for the reaction of  $[\text{Pd}(\text{dien})\text{Cl}]^+$  with pyrimidine, pyrazine and pyridazine; 0.10 M  $\text{NaClO}_4$ , 0.010M  $\text{NaCl}$ ,  $\text{pH} = 2.8$ .<sup>a</sup>

| $T/^\circ\text{C}$ | $C_{\text{pyrimidine}}/\text{M}$ | $k_{\text{obsd}}/\text{s}^{-1}$ | $C_{\text{pyrazine}}/\text{M}$ | $k_{\text{obsd}}/\text{s}^{-1}$ | $C_{\text{pyridazine}}/\text{M}$ | $k_{\text{obsd}}/\text{s}^{-1}$ |
|--------------------|----------------------------------|---------------------------------|--------------------------------|---------------------------------|----------------------------------|---------------------------------|
| 25                 | 0.006                            | 3.27(5)                         | 0.006                          | 3.45(5)                         | 0.006                            | 5.92(5)                         |
| 25                 | 0.0075                           | 4.27(4)                         | 0.0075                         | 4.28(5)                         | 0.0075                           | 7.87(6)                         |
| 25                 | 0.01                             | 5.62(7)                         | 0.01                           | 5.55(7)                         | 0.01                             | 10.6(4)                         |
| 25                 | 0.015                            | 8.42(4)                         | 0.015                          | 8.49(4)                         | 0.015                            | 14.4(8)                         |
| 25                 | 0.02                             | 10.8(8)                         | 0.02                           | 10.3(6)                         | 0.02                             | 20.2(4)                         |
| 25                 | 0.03                             | 16.4(5)                         | 0.03                           | 16.6(4)                         | 0.03                             | 28.4(7)                         |
| 25                 |                                  |                                 |                                |                                 | 0.04                             | 38.4(4)                         |

<sup>a</sup>Number of kinetic runs in parenthesis.

Table S7. Observed pseudo-first-order rate constants as a function of nucleophile concentration for the reaction of  $[\text{Pd}(\text{bpma})\text{Cl}]^+$  with triazole and pyrazole; 0.10 M  $\text{NaClO}_4$ , 0.010M  $\text{NaCl}$ ,  $\text{pH} = 2.8$ .<sup>a</sup>

| $T/^\circ\text{C}$ | $C_{\text{triazole}}/\text{M}$ | $k_{\text{obsd}}/\text{s}^{-1}$ | $C_{\text{pyrazole}}/\text{M}$ | $k_{\text{obsd}}/\text{s}^{-1}$ |
|--------------------|--------------------------------|---------------------------------|--------------------------------|---------------------------------|
| 25                 | 0.0015                         | 1.84(5)                         | 0.0015                         | 1.10(5)                         |
| 25                 | 0.003                          | 3.38(4)                         | 0.003                          | 2.24(8)                         |
| 25                 | 0.0045                         | 4.65(7)                         | 0.0045                         | 3.21(5)                         |
| 25                 | 0.006                          | 6.03(4)                         | 0.006                          | 4.36(4)                         |
| 25                 | 0.0075                         | 7.78(8)                         | 0.0075                         | 5.45(6)                         |
| 25                 | 0.01                           | 10.8(4)                         | 0.01                           | 7.30(7)                         |

<sup>a</sup>Number of kinetic runs in parenthesis.

Table S8. Observed pseudo-first-order rate constants as a function of nucleophile concentration for the reaction of  $[\text{Pd}(\text{bpma})\text{Cl}]^+$  with pyrimidine, pyrazine and pyridazine; 0.10 M  $\text{NaClO}_4$ , 0.010M  $\text{NaCl}$ , pH = 2.8.

| T/°C | C <sub>pyrimidine</sub> /M | k <sub>obsd</sub> /s <sup>-1</sup> | C <sub>pyrazine</sub> /M | k <sub>obsd</sub> /s <sup>-1</sup> | C <sub>pyridazine</sub> /M | k <sub>obsd</sub> /s <sup>-1</sup> |
|------|----------------------------|------------------------------------|--------------------------|------------------------------------|----------------------------|------------------------------------|
| 25   | 0.00015                    | 15(5)                              |                          |                                    |                            |                                    |
| 25   | 0.0003                     | 30(8)                              |                          |                                    |                            |                                    |
| 25   | 0.00045                    | 40.5(4)                            | very fast                |                                    | very fast                  |                                    |
| 25   | 0.0006                     | 60(7)                              |                          |                                    |                            |                                    |
| 25   | 0.00075                    | 71(4)                              |                          |                                    |                            |                                    |

<sup>a</sup>Number of kinetic runs in parenthesis.

Table S9. Observed pseudo-first-order rate constants as a function of pressure for the reaction of  $[\text{Pd}(\text{dien})\text{Cl}]^+$  with triazole (T = 16 °C); 0.10 M  $\text{NaClO}_4$ , 0.010M  $\text{NaCl}$ , pH = 2.8.

| Pressure, MPa       | k <sub>obsd</sub> /s <sup>-1</sup> |
|---------------------|------------------------------------|
| 10                  | 1.06                               |
| 50                  | 1.21                               |
| 91(76) <sup>a</sup> | 1.34                               |
| 132                 | 1.48                               |

<sup>a</sup>The pressure for the second set of data.

Table S10. Observed pseudo-first-order rate constants as a function of pressure for the reaction of  $[\text{Pd}(\text{dien})\text{Cl}]^+$  with pyrazole ( $T = 16\text{ }^\circ\text{C}$ ); 0.10 M  $\text{NaClO}_4$ , 0.010M  $\text{NaCl}$ ,  $\text{pH} = 2.8$ .

| Pressure, MPa | $k_{\text{obsd}}/\text{s}^{-1}$ |
|---------------|---------------------------------|
| 10            | 0.45                            |
| 50            | 0.54                            |
| 91            | 0.62                            |
| 132           | 0.67                            |

Table S11. Observed pseudo-first-order rate constants as a function of pressure for the reaction of  $[\text{Pd}(\text{dien})\text{Cl}]^+$  with pyrazine ( $T = 16\text{ }^\circ\text{C}$ ); 0.10 M  $\text{NaClO}_4$ , 0.010M  $\text{NaCl}$ ,  $\text{pH} = 2.8$ .

| Pressure, MPa | $k_{\text{obsd}}/\text{s}^{-1}$ |
|---------------|---------------------------------|
| 10            | 1.17                            |
| 50            | 1.35                            |
| 91            | 1.55                            |
| 132           | 1.75                            |

Table S12. Observed pseudo-first-order rate constants as a function of temperature for the reaction of  $[\text{Pd}(\text{dien})\text{Cl}]^+$  with different ligands:  $[\text{Pd}(\text{dien})\text{Cl}]^+ = 5.6 \times 10^{-4} \text{ M}$ ,  $[\text{Ligand}] = 0.006 \text{ M}$ ,  $[\text{Cl}^-] = 0.01 \text{ M}$ ,  $I = 0.1 \text{ M}$  ( $\text{NaClO}_4$ ),  $\text{pH} = 2.8$

| Ligand     | Temp. (°C) | $k_{\text{obs}}$ , $\text{s}^{-1}$ | $\Delta H^\ddagger$ ( $\text{kJ mol}^{-1}$ ) | $\Delta S^\ddagger$ ( $\text{J K}^{-1} \text{mol}^{-1}$ ) |
|------------|------------|------------------------------------|----------------------------------------------|-----------------------------------------------------------|
| Pyrazole   | 10         | 1.91                               | $43 \pm 1$                                   | $-47 \pm 4$                                               |
|            | 15         | 2.72                               |                                              |                                                           |
|            | 20         | 3.67                               |                                              |                                                           |
|            | 25         | 5.24                               |                                              |                                                           |
|            | 30         | 6.75                               |                                              |                                                           |
| Triazole   | 10         | 1.41                               | $46 \pm 1$                                   | $-37 \pm 2$                                               |
|            | 15         | 1.95                               |                                              |                                                           |
|            | 20         | 2.78                               |                                              |                                                           |
|            | 25         | 3.87                               |                                              |                                                           |
|            | 30         | 5.45                               |                                              |                                                           |
| Pyrimidine | 10         | 1.26                               | $44 \pm 1$                                   | $-45 \pm 5$                                               |
|            | 15         | 1.82                               |                                              |                                                           |
|            | 20         | 2.47                               |                                              |                                                           |
|            | 25         | 3.26                               |                                              |                                                           |
|            | 30         | 4.79                               |                                              |                                                           |
| Pyrazine   | 10         | 1.23                               | $47 \pm 1$                                   | $-34 \pm 3$                                               |
|            | 15         | 1.72                               |                                              |                                                           |
|            | 20         | 2.54                               |                                              |                                                           |
|            | 25         | 3.44                               |                                              |                                                           |
|            | 30         | 4.92                               |                                              |                                                           |
| Pyridazine | 10         | 2.16                               | $45 \pm 1$                                   | $-38 \pm 2$                                               |
|            | 15         | 3.10                               |                                              |                                                           |
|            | 20         | 4.42                               |                                              |                                                           |
|            | 25         | 5.92                               |                                              |                                                           |
|            | 30         | 8.16                               |                                              |                                                           |

Tables S13. Observed pseudo-first-order rate constants as a function of temperature for the reaction of  $[\text{Pd}(\text{bpma})\text{Cl}]^+$  with different ligands:  $[\text{Pd}(\text{bpma})\text{Cl}]^+ = 1.2 \times 10^{-4} \text{ M}$ ,  $[\text{Ligand}] = 0.0015 \text{ M}$  ( $0.00015 \text{ M}$  for pyrimidine),  $[\text{Cl}^-] = 0.01 \text{ M}$ ,  $I = 0.1 \text{ M}$  ( $\text{NaClO}_4$ ),  $\text{pH} = 2.8$

| Ligand     | Temp. (°C)                      | $k_{\text{obs}}$ , $\text{s}^{-1}$ | $\Delta H^\ddagger$ ( $\text{kJ mol}^{-1}$ ) | $\Delta S^\ddagger$ ( $\text{J K}^{-1} \text{mol}^{-1}$ ) |
|------------|---------------------------------|------------------------------------|----------------------------------------------|-----------------------------------------------------------|
| Pyrazole   | 10                              | 0.72                               | $45 \pm 2$                                   | $-34 \pm 6$                                               |
|            | 15                              | 1.1                                |                                              |                                                           |
|            | 20                              | 1.5                                |                                              |                                                           |
|            | 25                              | 2.0                                |                                              |                                                           |
| Triazole   | 10                              | 1.59                               | $39 \pm 3$                                   | $-48 \pm 8$                                               |
|            | 15                              | 1.83                               |                                              |                                                           |
|            | 20                              | 3.22                               |                                              |                                                           |
|            | 25                              | 4.0                                |                                              |                                                           |
|            | 30                              | 4.65                               |                                              |                                                           |
| Pyrimidine | 10                              | 12.1                               | $31 \pm 1$                                   | $-41 \pm 4$                                               |
|            | 15                              | 15.1                               |                                              |                                                           |
|            | 20                              | 20.2                               |                                              |                                                           |
|            | 25                              | 24.3                               |                                              |                                                           |
| Pyrazine   | Very fast and hence not studied |                                    |                                              |                                                           |
| Pyridazine | Very fast and hence not studied |                                    |                                              |                                                           |



Tables S14. Observed pseudo-first-order rate constants as a function of temperature for the reaction of  $[\text{Pd}(\text{dien})\text{H}_2\text{O}]^{2+}$  with different ligands:  $[\text{Pd}(\text{dien})\text{H}_2\text{O}]^{2+} = 6.7 \times 10^{-4} \text{ M}$ ,  $[\text{Ligand}] = 0.0075 \text{ M}$  (for pyrazole  $0.01 \text{ M}$ ),  $I = 0.1 \text{ M}$  ( $\text{NaClO}_4$ ),  $\text{pH} = 2.8$

| Ligand     | Temp. ( $^{\circ}\text{C}$ ) | $k_{\text{obs}}$ , $\text{s}^{-1}$ | $\Delta H^{\ddagger}$ ( $\text{kJ mol}^{-1}$ ) | $\Delta S^{\ddagger}$ ( $\text{J K}^{-1} \text{mol}^{-1}$ ) |
|------------|------------------------------|------------------------------------|------------------------------------------------|-------------------------------------------------------------|
| Pyrazole   | 5                            | 24.6                               | $35 \pm 1$                                     | $-56 \pm 3$                                                 |
|            | 10                           | 31.5                               |                                                |                                                             |
|            | 15                           | 41.1                               |                                                |                                                             |
|            | 20                           | 55.3                               |                                                |                                                             |
|            | 25                           | 70.9                               |                                                |                                                             |
|            | 30                           | 92.5                               |                                                |                                                             |
| Triazole   | 10                           | 27.7                               | $36 \pm 1$                                     | $-48 \pm 4$                                                 |
|            | 15                           | 37.1                               |                                                |                                                             |
|            | 20                           | 45.4                               |                                                |                                                             |
|            | 25                           | 65.2                               |                                                |                                                             |
|            | 30                           | 82.4                               |                                                |                                                             |
|            |                              | 106.3                              |                                                |                                                             |
| Pyrimidine | 10                           | 12.2                               | $36 \pm 0.5$                                   | $-53 \pm 2$                                                 |
|            | 15                           | 16.2                               |                                                |                                                             |
|            | 20                           | 22.3                               |                                                |                                                             |
|            | 25                           | 28.7                               |                                                |                                                             |
|            | 30                           | 37.5                               |                                                |                                                             |
|            |                              | 47.9                               |                                                |                                                             |
| Pyrazine   | 10                           | 9.14                               | $37 \pm 2$                                     | $-52 \pm 5$                                                 |
|            | 15                           | 12.0                               |                                                |                                                             |
|            | 20                           | 18.7                               |                                                |                                                             |
|            | 25                           | 22.2                               |                                                |                                                             |
|            | 30                           | 28.9                               |                                                |                                                             |
|            |                              | 37.4                               |                                                |                                                             |
| Pyridazine | 10                           | 36.1                               | $37 \pm 1$                                     | $-42 \pm 3$                                                 |
|            | 15                           | 50.5                               |                                                |                                                             |
|            | 20                           | 66.2                               |                                                |                                                             |
|            | 25                           | 92.0                               |                                                |                                                             |
|            | 30                           | 112.3                              |                                                |                                                             |
|            |                              | 146.6                              |                                                |                                                             |

Tables S15. Observed pseudo-first-order rate constants as a function of temperature for the reaction of  $[\text{Pd}(\text{bpma})\text{H}_2\text{O}]^{2+}$  with different ligands:  $[\text{Pd}(\text{bpma})\text{H}_2\text{O}]^{2+} = 5.2 \times 10^{-5} / 2.1 \times 10^{-4} / 1.1 \times 10^{-4} \text{ M}$ ,  $[\text{L}] = 5.8 \times 10^{-4} / 3 \times 10^{-4} / 2.1 \times 10^{-3} \text{ M}$ ,  $I = 0.1 \text{ M}$  ( $\text{NaClO}_4$ ),  $\text{pH} = 2.8$

| Ligand     | Temp. (°C)                      | $k_{\text{obs}}$ , $\text{s}^{-1}$ | $\Delta H^\ddagger$ ( $\text{kJ mol}^{-1}$ ) | $\Delta S^\ddagger$ ( $\text{J K}^{-1} \text{mol}^{-1}$ ) |
|------------|---------------------------------|------------------------------------|----------------------------------------------|-----------------------------------------------------------|
| Pyrazole   | 5                               | 164.5                              | $24 \pm 2$                                   | $-82 \pm 5$                                               |
|            | 10                              | 206.2                              |                                              |                                                           |
|            | 15                              | 256                                |                                              |                                                           |
|            | 20                              | 312.7                              |                                              |                                                           |
|            | 25                              | 337.5                              |                                              |                                                           |
|            | 30                              | 450.                               |                                              |                                                           |
| Triazole   | 5                               | 32.8                               | $29 \pm 2$                                   | $-58 \pm 6$                                               |
|            | 10                              | 43.5                               |                                              |                                                           |
|            | 15                              | 50.6                               |                                              |                                                           |
|            | 20                              | 72.4                               |                                              |                                                           |
|            | 25                              | 80.9                               |                                              |                                                           |
|            | 30                              | 99.8                               |                                              |                                                           |
| Pyrimidine | 5                               | 6.6                                | $40 \pm 1$                                   | $-26 \pm 4$                                               |
|            | 10                              | 8.5                                |                                              |                                                           |
|            | 15                              | 11.3                               |                                              |                                                           |
|            | 20                              | 16.1                               |                                              |                                                           |
|            | 25                              | 22.1                               |                                              |                                                           |
|            | 30                              | 28.8                               |                                              |                                                           |
| Pyrazine   | Very fast and hence not studied |                                    |                                              |                                                           |
| Pyridazine | Very fast and hence not studied |                                    |                                              |                                                           |
